# Supplementary material
Source: MDPI journal article supplement (https://www.mdpi.com/2571-9408/6/12/391)
Supplement: s1 [file s1]

## Supplementary Material

### ANTOINE JANOT

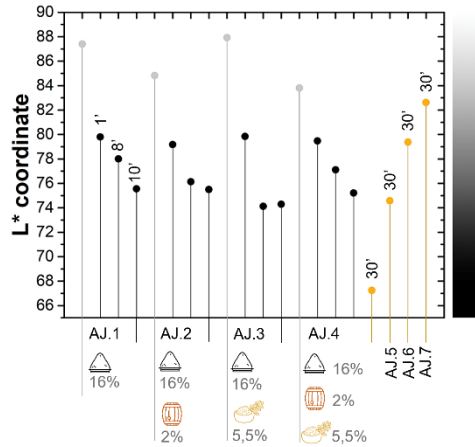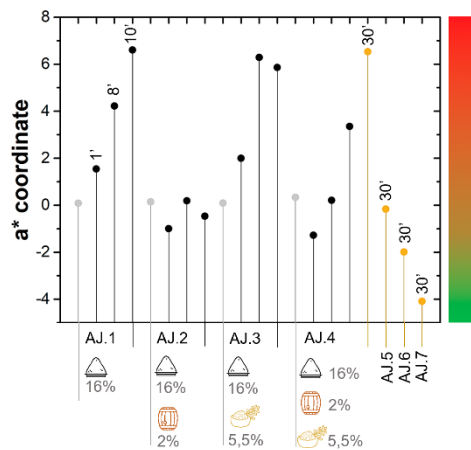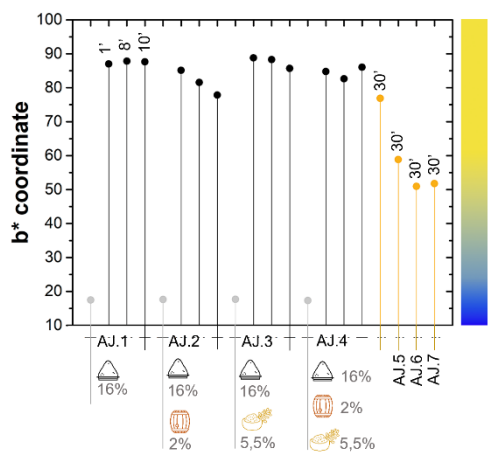

### PAUL GOUT

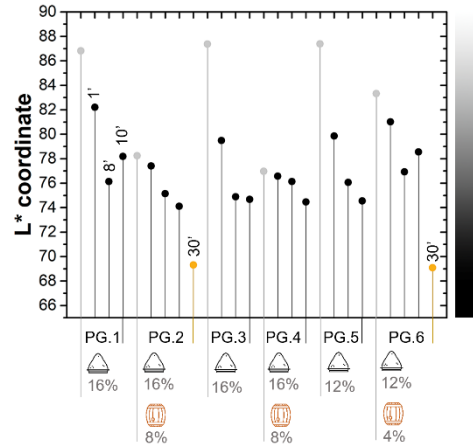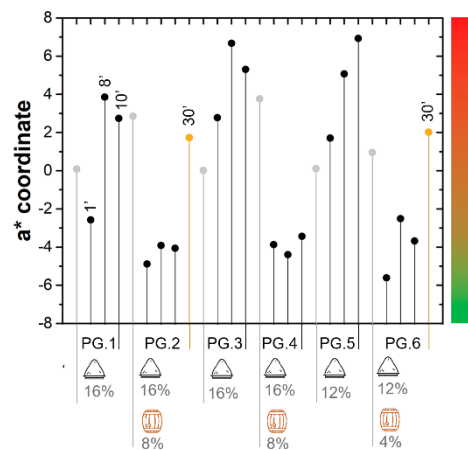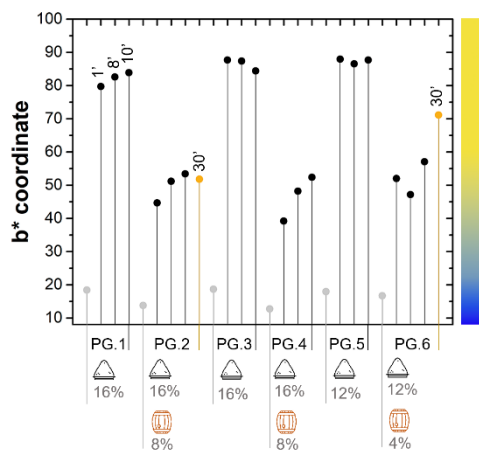

**Figure S1.** Colourimetry analysis for every recipe variation for both dye masters. In grey are the undyed mordanted cloths; in yellow are the final versions for each recipe, according to Table 2. Per variation, the dyeing times tested were 1, 8 and 10 minutes. The final version, 30 minutes in the dyeing bath, also has the addition of lime.

**Table S1.** Colourimetry data for Antoine Janot samples with the average and the percentage for standard deviation. In grey are the undyed samples, in yellow are the final versions.

| <b>Recipe variation</b> | <b>Sample</b> |                  | <b>L*</b>            | <b>a*</b>              | <b>b*</b>            |
|-------------------------|---------------|------------------|----------------------|------------------------|----------------------|
| <b>AJ.1</b>             | Undyed        | Average<br>%ST D | <b>87,41</b><br>0,25 | <b>0,08</b><br>91,65   | <b>17,49</b><br>1,43 |
|                         | 1 min         | Average<br>%ST D | <b>79,80</b><br>0,26 | <b>1,54</b><br>52,34   | <b>87,04</b><br>1,49 |
|                         | 8 min         | Average<br>%ST D | <b>77,98</b><br>0,80 | <b>4,22</b><br>13,40   | <b>87,82</b><br>0,45 |
|                         | 10 min        | Average<br>%ST D | <b>75,55</b><br>0,26 | <b>6,58</b><br>5,25    | <b>87,65</b><br>1,14 |
| <b>AJ.2</b>             | Undyed        | Average<br>%ST D | <b>84,83</b><br>0,31 | <b>0,14</b><br>48,72   | <b>17,65</b><br>2,07 |
|                         | 1 min         | Average<br>%ST D | <b>79,17</b><br>0,04 | <b>-1,00</b><br>70,36  | <b>85,13</b><br>1,87 |
|                         | 8 min         | Average<br>%ST D | <b>76,14</b><br>0,50 | <b>0,19</b><br>744,76  | <b>81,57</b><br>3,73 |
|                         | 10 min        | Average<br>%ST D | <b>75,51</b><br>0,31 | <b>-0,47</b><br>116,24 | <b>77,83</b><br>1,14 |
| <b>AJ.3</b>             | Undyed        | Average<br>%ST D | <b>87,93</b><br>0,11 | <b>0,09</b><br>107,21  | <b>17,66</b><br>4,03 |
|                         | 1 min         | Average<br>%ST D | <b>79,84</b><br>0,44 | <b>2,00</b><br>8,72    | <b>88,82</b><br>0,51 |
|                         | 8 min         | Average<br>%ST D | <b>74,13</b><br>0,95 | <b>6,29</b><br>10,50   | <b>88,29</b><br>0,91 |
|                         | 10 min        | Average<br>%ST D | <b>74,29</b><br>2,56 | <b>5,86</b><br>31,68   | <b>85,71</b><br>0,90 |
| <b>AJ.4</b>             | Undyed        | Average<br>%ST D | <b>83,81</b><br>0,76 | <b>0,33</b><br>1,73    | <b>17,33</b><br>3,55 |
|                         | 1 min         | Average<br>%ST D | <b>79,48</b><br>0,65 | <b>-1,28</b><br>131,22 | <b>84,78</b><br>3,82 |
|                         | 8 min         | Average<br>%ST D | <b>77,12</b><br>0,77 | <b>0,21</b><br>299,28  | <b>82,62</b><br>1,17 |
|                         | 10 min        | Average<br>%ST D | <b>75,22</b><br>0,64 | <b>3,35</b><br>12,26   | <b>86,04</b><br>1,25 |
|                         | 30 min lime   | Average<br>%ST D | <b>67,25</b><br>0,28 | <b>6,53</b><br>7,67    | <b>76,91</b><br>0,95 |
| <b>AJ.5</b>             | 30 min lime   | Average<br>%ST D | <b>74,58</b><br>1,02 | <b>-0,16</b><br>165,68 | <b>58,84</b><br>1,93 |
| <b>AJ.6</b>             | 30 min lime   | Average<br>%ST D | <b>79,38</b><br>1,04 | <b>-1,99</b><br>15,06  | <b>50,93</b><br>0,81 |
| <b>AJ.7</b>             | 30 min lime   | Average<br>%ST D | <b>82,62</b><br>1,22 | <b>-4,09</b><br>7,84   | <b>51,75</b><br>1,95 |

**Table S2.** Colourimetry data for Paul Gout samples with the average and the percentage for standard deviation. In grey are the undyed samples, in yellow are the final versions.

| <b>Recipe variation</b> | <b>Sample</b> |                  | <b>L*</b>            | <b>a*</b>             | <b>b*</b>            |
|-------------------------|---------------|------------------|----------------------|-----------------------|----------------------|
| <b>PG.1</b>             | Undyed        | Average<br>%ST D | <b>86,83</b><br>0,38 | <b>0,09</b><br>57,74  | <b>18,39</b><br>1,46 |
|                         | 1 min         | Average<br>%ST D | <b>82,21</b><br>0,63 | <b>-2,58</b><br>23,41 | <b>79,71</b><br>0,96 |
|                         | 8 min         | Average<br>%ST D | <b>76,13</b><br>1,38 | <b>3,85</b><br>15,19  | <b>82,59</b><br>1,53 |
|                         | 10 min        | Average<br>%ST D | <b>78,19</b><br>4,06 | <b>2,74</b><br>136,84 | <b>83,86</b><br>4,08 |
| <b>PG.2</b>             | Undyed        | Average<br>%ST D | <b>78,25</b><br>0,76 | <b>2,85</b><br>0,88   | <b>13,77</b><br>3,06 |
|                         | 1 min         | Average<br>%ST D | <b>77,41</b><br>0,74 | <b>-4,89</b><br>7,89  | <b>44,66</b><br>4,58 |
|                         | 8 min         | Average<br>%ST D | <b>75,15</b><br>0,29 | <b>-3,92</b><br>4,25  | <b>51,17</b><br>0,58 |
|                         | 10 min        | Average<br>%ST D | <b>74,11</b><br>1,77 | <b>-4,06</b><br>2,43  | <b>53,38</b><br>4,34 |
|                         | 30 min lime   | Average<br>%ST D | <b>69,31</b><br>0,38 | <b>1,73</b><br>10,84  | <b>51,78</b><br>4,00 |
| <b>PG.3</b>             | Undyed        | Average<br>%ST D | <b>87,37</b><br>0,39 | <b>0,01</b><br>241,09 | <b>18,66</b><br>1,33 |
|                         | 1 min         | Average<br>%ST D | <b>79,49</b><br>0,54 | <b>2,78</b><br>21,23  | <b>87,65</b><br>1,10 |
|                         | 8 min         | Average<br>%ST D | <b>74,89</b><br>1,02 | <b>6,67</b><br>7,54   | <b>87,35</b><br>0,53 |
|                         | 10 min        | Average<br>%ST D | <b>74,67</b><br>0,07 | <b>5,30</b><br>7,20   | <b>84,39</b><br>0,91 |
| <b>PG.4</b>             | Undyed        | Average<br>%ST D | <b>76,97</b><br>1,20 | <b>3,76</b><br>7,71   | <b>12,74</b><br>3,77 |
|                         | 1 min         | Average<br>%ST D | <b>76,58</b><br>3,08 | <b>-3,87</b><br>5,58  | <b>39,18</b><br>1,70 |
|                         | 8 min         | Average<br>%ST D | <b>76,13</b><br>0,44 | <b>-4,40</b><br>2,98  | <b>48,21</b><br>5,89 |
|                         | 10 min        | Average<br>%ST D | <b>74,47</b><br>0,44 | <b>-3,44</b><br>4,39  | <b>52,38</b><br>5,81 |
| <b>PG.5</b>             | Undyed        | Average<br>%ST D | <b>87,38</b><br>0,03 | <b>0,10</b><br>47,74  | <b>17,91</b><br>0,61 |
|                         | 1 min         | Average<br>%ST D | <b>79,86</b><br>0,33 | <b>1,71</b><br>17,67  | <b>87,91</b><br>1,09 |
|                         | 8 min         | Average<br>%ST D | <b>76,07</b><br>0,67 | <b>5,07</b><br>14,59  | <b>86,55</b><br>1,09 |
|                         | 10 min        | Average<br>%ST D | <b>74,55</b><br>1,20 | <b>6,92</b><br>15,70  | <b>87,65</b><br>1,00 |
| <b>PG.6</b>             | Undyed        | Average<br>%ST D | <b>83,32</b><br>0,05 | <b>0,96</b><br>5,76   | <b>16,71</b><br>0,34 |
|                         | 1 min         | Average<br>%ST D | <b>81,01</b><br>0,54 | <b>-5,61</b><br>3,39  | <b>51,99</b><br>5,87 |

|  |             |         |              |              |              |
|--|-------------|---------|--------------|--------------|--------------|
|  | 8 min       | Average | <b>76,93</b> | <b>-2,51</b> | <b>47,16</b> |
|  |             | %ST D   | 2,05         | 35,09        | 15,79        |
|  | 10 min      | Average | <b>78,56</b> | <b>-3,68</b> | <b>57,05</b> |
|  |             | %ST D   | 0,50         | 3,62         | 5,78         |
|  | 30 min lime | Average | <b>69,09</b> | <b>2,02</b>  | <b>71,10</b> |
|  |             | %ST D   | 2,24         | 65,74        | 4,54         |

**Table S3.** Concentration of all chromophores extracted from all samples prepared following Antoine Janot's recipes, expressed in M of equivalents of Luteolin-7-O-glucoside (glucoside forms) or Luteolin (aglycone forms). Same superscripts within each column (a-k) indicate not significant differences ( $P > 0.05$ ).

| Sample      | Api-6,8-C-glc                                              | Lut-di-glc                                                 | Lut-3',7-di-O-glc                                          | Lut-7-O-glc                                                  | Api-7-O-glc                                                  | Chry-O-gly                                                        |
|-------------|------------------------------------------------------------|------------------------------------------------------------|------------------------------------------------------------|--------------------------------------------------------------|--------------------------------------------------------------|-------------------------------------------------------------------|
| AJ.1        | $8.01 \times 10^{-6} \text{ a,b,c,d} \pm 2 \times 10^{-8}$ | $9.78 \times 10^{-6} \text{ a,b} \pm 4 \times 10^{-8}$     | $1.80 \times 10^{-5} \text{ a,b} \pm 3 \times 10^{-7}$     | $1.42 \times 10^{-4} \text{ a,b,c} \pm 1 \times 10^{-6}$     | $1.9 \times 10^{-5} \text{ a,b,c} \pm 1 \times 10^{-6}$      | $2.71 \times 10^{-5} \text{ a,b} \pm 6 \times 10^{-7}$            |
| AJ.2        | $7.8 \times 10^{-6} \pm 2 \times 10^{-7}$                  | $8.7 \times 10^{-6} \text{ c,d} \pm 2 \times 10^{-7}$      | $1.47 \times 10^{-5} \text{ a,c} \pm 3 \times 10^{-7}$     | $1.24 \times 10^{-4} \text{ a,d,e} \pm 2 \times 10^{-6}$     | $1.6 \times 10^{-5} \text{ d,e} \pm 1 \times 10^{-6}$        | $2.5 \times 10^{-5} \text{ c,d,e} \pm 2 \times 10^{-6}$           |
| AJ.3        | $7.96 \times 10^{-6} \text{ h,i} \pm 2 \times 10^{-8}$     | $9.0 \times 10^{-6} \text{ a,e,f} \pm 1 \times 10^{-7}$    | $1.65 \times 10^{-5} \text{ d} \pm 3 \times 10^{-7}$       | $1.53 \times 10^{-4} \text{ d,f} \pm 3 \times 10^{-6}$       | $1.80 \times 10^{-5} \text{ d,f} \pm 8 \times 10^{-7}$       | $2.27 \times 10^{-5} \text{ a,f} \pm 4 \times 10^{-7}$            |
| AJ.4        | $7.89 \times 10^{-6} \text{ e,f,g} \pm 5 \times 10^{-8}$   | $9.77 \times 10^{-6} \text{ c,g,h} \pm 5 \times 10^{-8}$   | $1.83 \times 10^{-5} \text{ c,e} \pm 1 \times 10^{-7}$     | $1.30 \times 10^{-4} \text{ d,g,h} \pm 4 \times 10^{-6}$     | $1.9 \times 10^{-5} \text{ g} \pm 2 \times 10^{-6}$          | $2.6 \times 10^{-5} \text{ g,h} \pm 2 \times 10^{-6}$             |
| AJ.4 Jaune  | $7.27 \times 10^{-6} \text{ a,e,h} \pm 1 \times 10^{-8}$   | $7.4 \times 10^{-6} \text{ a,g,i} \pm 1 \times 10^{-7}$    | $9.26 \times 10^{-6} \text{ a,c,d,e} \pm 2 \times 10^{-8}$ | $5.13 \times 10^{-5} \text{ a,b,d,g,h} \pm 2 \times 10^{-7}$ | $9.7 \times 10^{-6} \text{ a,d} \pm 2 \times 10^{-7}$        | $9.4 \times 10^{-6} \text{ a,c,g} \pm 4 \times 10^{-7}$           |
| AJ.5 Citron | $7.470 \times 10^{-6} \text{ b,f,h} \pm 6 \times 10^{-9}$  | $7.78 \times 10^{-6} \text{ e,h} \pm 2 \times 10^{-8}$     | $1.06 \times 10^{-5} \text{ b,c,d,e} \pm 2 \times 10^{-7}$ | $4.701 \times 10^{-5} \text{ b,d,g,h} \pm 5 \times 10^{-8}$  | $1.104 \times 10^{-5} \text{ b,f} \pm 9 \times 10^{-8}$      | $1.164 \times 10^{-5} \text{ b,d,f,h} \pm 3 \times 10^{-8}$       |
| AJ.6 Soufré | $7.730 \times 10^{-6} \text{ c,i} \pm 2 \times 10^{-9}$    | $8.00 \times 10^{-6} \text{ b,d,f,i} \pm 8 \times 10^{-8}$ | $1.17 \times 10^{-5} \text{ b,c,d,e} \pm 2 \times 10^{-7}$ | $4.55 \times 10^{-5} \text{ c,e,f,h} \pm 3 \times 10^{-7}$   | $1.190 \times 10^{-5} \text{ a,b,c,f} \pm 10 \times 10^{-8}$ | $1.225 \times 10^{-5} \text{ a,b,c,e,f,g,h} \pm 6 \times 10^{-8}$ |
| AJ.7 Paille | $7.50 \times 10^{-6} \text{ d,g,i} \pm 7 \times 10^{-8}$   | $7.6 \times 10^{-6} \text{ b,d,f,i} \pm 1 \times 10^{-7}$  | $9.76 \times 10^{-6} \text{ b,c,d,e} \pm 7 \times 10^{-8}$ | $2.77 \times 10^{-5} \text{ c,d,e,f,h} \pm 3 \times 10^{-7}$ | $9.47 \times 10^{-6} \text{ b,c,e,f,g} \pm 3 \times 10^{-8}$ | $9.2 \times 10^{-6} \text{ a,b,e,f,h} \pm 1 \times 10^{-7}$       |

  

| Sample      | Lut-4'-O-glc                                                  | Lut                                                     | Api                                                          |
|-------------|---------------------------------------------------------------|---------------------------------------------------------|--------------------------------------------------------------|
| AJ.1        | $2.53 \times 10^{-5} \text{ a,c,d,e} \pm 2 \times 10^{-7}$    | $4.14 \times 10^{-4} \text{ a} \pm 2 \times 10^{-6}$    | $4.0 \times 10^{-5} \text{ a,b,c} \pm 2 \times 10^{-6}$      |
| AJ.2        | $2.73 \times 10^{-5} \text{ b,f,g} \pm 9 \times 10^{-7}$      | $6.168 \times 10^{-4} \text{ a,b} \pm 6 \times 10^{-7}$ | $5.1 \times 10^{-5} \text{ d,e,f} \pm 3 \times 10^{-6}$      |
| AJ.3        | $1.9 \times 10^{-5} \text{ a,b,h} \pm 1 \times 10^{-6}$       | $2.24 \times 10^{-4} \text{ a,b} \pm 1 \times 10^{-6}$  | $2.32 \times 10^{-5} \text{ a,d,e,f,g} \pm 6 \times 10^{-7}$ |
| AJ.4        | $2.5 \times 10^{-5} \text{ l,j} \pm 2 \times 10^{-6}$         | $4.0 \times 10^{-4} \text{ b} \pm 1 \times 10^{-5}$     | $4.0 \times 10^{-5} \text{ a,g,h,i} \pm 2 \times 10^{-6}$    |
| AJ.4 Jaune  | $1.089 \times 10^{-5} \text{ a,b,c,l,k} \pm 1 \times 10^{-8}$ | $1.09 \times 10^{-4} \text{ a,b} \pm 1 \times 10^{-6}$  | $1.46 \times 10^{-5} \text{ a,c,d,g} \pm 4 \times 10^{-7}$   |
| AJ.5 Citron | $7.4 \times 10^{-6} \text{ c,d,f,i} \pm 2 \times 10^{-7}$     | $7.37 \times 10^{-5} \text{ a,b} \pm 2 \times 10^{-7}$  | $1.62 \times 10^{-5} \text{ b,e,h} \pm 5 \times 10^{-7}$     |
| AJ.6 Soufré | $4.87 \times 10^{-5} \text{ e,g,k} \pm 1 \times 10^{-7}$      | $4.87 \times 10^{-5} \text{ a,b} \pm 1 \times 10^{-7}$  | $1.37 \times 10^{-5} \text{ f,i} \pm 4 \times 10^{-7}$       |
| AJ.7 Paille | $2.1 \times 10^{-6} \text{ d,e,f,g,h,j} \pm 1 \times 10^{-7}$ | $2.12 \times 10^{-5} \text{ a,b} \pm 1 \times 10^{-7}$  | $9.7 \times 10^{-6} \text{ b,c,g,h,i} \pm 1 \times 10^{-7}$  |

Api-6,8-C-glc: Apigenin-6,8-C-glucoside; Lut-di-glc: Luteolin-di-glucoside; Lut-3',7-di-O-glc: Luteolin-3',7-di-O-glucoside; Lut-7-O-glc: Luteolin-7-O-glucoside; Api-7-O-glc: Apigenin-7-O-glucoside; Chry-O-gly: Chrysoeriol-O-glycoside; Lut-4'-O-glc: Luteolin-4'-O-glucoside; Lut: Luteolin; Api: Apigenin

**Table S4.** Concentration of all chromophores extracted from all samples prepared following Paul Gout's recipes, expressed in M of equivalents of Luteolin-7-O-glucoside (glucoside forms) or Luteolin (aglycone forms). Same superscripts within each column (a-j) indicate not significant differences ( $P > 0.05$ ).

| Sample            | Api-6,8-C-glc                                               | Lut-di-glc                                                     | Lut-3',7-di-O-glc                                              | Lut-7-O-glc                                                   | Api-7-O-glc                                               | Chry-O-gly                                                    |
|-------------------|-------------------------------------------------------------|----------------------------------------------------------------|----------------------------------------------------------------|---------------------------------------------------------------|-----------------------------------------------------------|---------------------------------------------------------------|
| <b>PG.1</b>       | $7.72 \times 10^{-6} \text{ a,b} \pm 4 \times 10^{-8}$      | $8.43 \times 10^{-6} \text{ a,b,c,d,e} \pm 4 \times 10^{-8}$   | $1.26 \times 10^{-5} \text{ a,b} \pm 7 \times 10^{-7}$         | $7.8 \times 10^{-5} \text{ a,b} \pm 3 \times 10^{-6}$         | $1.13 \times 10^{-5} \text{ a} \pm 10 \times 10^{-7}$     | $1.39 \times 10^{-5} \text{ a,b,c} \pm 9 \times 10^{-7}$      |
| <b>PG.2</b>       | $7.604 \times 10^{-6} \text{ c,d,e,f} \pm 3 \times 10^{-9}$ | $8.0 \times 10^{-6} \text{ f} \pm 1 \times 10^{-7}$            | $1.15 \times 10^{-5} \text{ c} \pm 4 \times 10^{-7}$           | $6.14 \times 10^{-5} \text{ c,d,e,f} \pm 2 \times 10^{-7}$    | $1.17 \times 10^{-5} \text{ b} \pm 5 \times 10^{-7}$      | $1.55 \times 10^{-5} \text{ d,e,f} \pm 3 \times 10^{-7}$      |
| <b>PG.2 Jaune</b> | $7.42 \times 10^{-6} \text{ a,d,g} \pm 1 \times 10^{-8}$    | $7.76 \times 10^{-6} \text{ a,g} \pm 1 \times 10^{-8}$         | $8.90 \times 10^{-6} \text{ a,d,e} \pm 9 \times 10^{-8}$       | $2.62 \times 10^{-5} \text{ a,c,g} \pm 3 \times 10^{-7}$      | $9.384 \times 10^{-5} \text{ c,d} \pm 4 \times 10^{-8}$   | $9.0 \times 10^{-6} \text{ a,d,g} \pm 3 \times 10^{-7}$       |
| <b>PG.3 Limon</b> | $7.44 \times 10^{-6} \text{ e,h} \pm 2 \times 10^{-8}$      | $7.75 \times 10^{-6} \text{ b} \pm 2 \times 10^{-8}$           | $9.0 \times 10^{-6} \text{ f} \pm 9 \times 10^{-7}$            | $2.077 \times 10^{-5} \text{ a,b,c,h} \pm 4 \times 10^{-7}$   | $9.08 \times 10^{-5} \text{ e,f,g} \pm 2 \times 10^{-7}$  | $9.3 \times 10^{-6} \text{ b,e,h} \pm 3 \times 10^{-7}$       |
| <b>PG.4</b>       | $7.41 \times 10^{-6} \text{ b,c} \pm 1 \times 10^{-8}$      | $7.96 \times 10^{-6} \text{ c} \pm 9 \times 10^{-8}$           | $1.16 \times 10^{-5} \text{ d,g} \pm 4 \times 10^{-7}$         | $7.95 \times 10^{-5} \text{ e,g,h} \pm 8 \times 10^{-7}$      | $1.30 \times 10^{-5} \text{ c,e,h} \pm 5 \times 10^{-7}$  | $1.68 \times 10^{-5} \text{ g,h,i,j} \pm 6 \times 10^{-7}$    |
| <b>PG.5</b>       | $7.31 \times 10^{-6} \text{ b,f} \pm 2 \times 10^{-8}$      | $7.63 \times 10^{-6} \text{ d} \pm 2 \times 10^{-8}$           | $1.08 \times 10^{-5} \text{ h} \pm 7 \times 10^{-7}$           | $9.1 \times 10^{-5} \text{ d,f,g,h} \pm 1 \times 10^{-6}$     | $1.096 \times 10^{-5} \text{ d,f} \pm 1 \times 10^{-8}$   | $1.11 \times 10^{-5} \text{ c,f,i} \pm 6 \times 10^{-7}$      |
| <b>PG.6</b>       | $8.22 \times 10^{-6} \text{ c,d,e,f} \pm 1 \times 10^{-7}$  | $9.51 \times 10^{-6} \text{ b,c,d,e,f,g} \pm 8 \times 10^{-8}$ | $1.97 \times 10^{-5} \text{ b,c,e,f,g,h} \pm 3 \times 10^{-7}$ | $1.591 \times 10^{-4} \text{ b,d,f,g,h} \pm 4 \times 10^{-7}$ | $2.0 \times 10^{-6} \text{ a,b,d,g} \pm 1 \times 10^{-6}$ | $2.5 \times 10^{-5} \text{ c,f,g,h,i,j} \pm 1 \times 10^{-6}$ |
| <b>PG.6 Jaune</b> | $7.62 \times 10^{-6} \text{ g,h} \pm 3 \times 10^{-8}$      | $8.00 \times 10^{-6} \text{ d,e,g} \pm 5 \times 10^{-8}$       | $9.9 \times 10^{-6} \text{ b,e,g} \pm 2 \times 10^{-7}$        | $5.4 \times 10^{-5} \text{ d,f,g,h} \pm 1 \times 10^{-6}$     | $1.01 \times 10^{-5} \text{ h} \pm 4 \times 10^{-7}$      | $1.18 \times 10^{-5} \text{ j} \pm 7 \times 10^{-7}$          |

  

| Sample            | Lut-4'-O-glc                                               | Lut                                                      | Api                                                          |
|-------------------|------------------------------------------------------------|----------------------------------------------------------|--------------------------------------------------------------|
| <b>PG.1</b>       | $1.39 \times 10^{-5} \text{ a} \pm 9 \times 10^{-7}$       | $1.858 \times 10^{-4} \text{ a,b} \pm 3 \times 10^{-7}$  | $1.9 \times 10^{-5} \text{ a,b} \pm 2 \times 10^{-6}$        |
| <b>PG.2</b>       | $1.55 \times 10^{-5} \text{ b,c} \pm 3 \times 10^{-7}$     | $2.28 \times 10^{-4} \text{ a,b} \pm 2 \times 10^{-6}$   | $2.6 \times 10^{-5} \text{ c} \pm 1 \times 10^{-6}$          |
| <b>PG.2 Jaune</b> | $9.0 \times 10^{-6} \text{ b,d,e} \pm 2 \times 10^{-7}$    | $7.193 \times 10^{-4} \text{ a} \pm 4 \times 10^{-7}$    | $1.53 \times 10^{-5} \text{ c,d,e,f,g} \pm 2 \times 10^{-7}$ |
| <b>PG.3 Limon</b> | $8.89 \times 10^{-6} \text{ a,c,f,g} \pm 8 \times 10^{-8}$ | $4.076 \times 10^{-4} \text{ a,b} \pm 10 \times 10^{-7}$ | $1.33 \times 10^{-5} \text{ c,d,e,f,g} \pm 2 \times 10^{-7}$ |
| <b>PG.4</b>       | $1.763 \times 10^{-5} \text{ b,f,h} \pm 5 \times 10^{-8}$  | $2.336 \times 10^{-4} \text{ b} \pm 4 \times 10^{-7}$    | $2.57 \times 10^{-5} \text{ a,d} \pm 8 \times 10^{-7}$       |
| <b>PG.5</b>       | $1.30 \times 10^{-5} \text{ d,f} \pm 5 \times 10^{-7}$     | $3.571 \times 10^{-4} \text{ a,b} \pm 4 \times 10^{-7}$  | $2.6 \times 10^{-5} \text{ e} \pm 1 \times 10^{-6}$          |
| <b>PG.6</b>       | $2.12 \times 10^{-5} \text{ d,g} \pm 1 \times 10^{-6}$     | $2.66 \times 10^{-4} \text{ a,b} \pm 2 \times 10^{-6}$   | $3.0 \times 10^{-5} \text{ b,f} \pm 1 \times 10^{-6}$        |
| <b>PG.6 Jaune</b> | $1.45 \times 10^{-5} \text{ e,g,h} \pm 3 \times 10^{-7}$   | $3.333 \times 10^{-4} \text{ a,b} \pm 2 \times 10^{-7}$  | $2.56 \times 10^{-5} \text{ g} \pm 2 \times 10^{-7}$         |

Api-6,8-C-glc: Apigenin-6,8-C-glucoside; Lut-di-glc: Luteolin-di-glucoside; Lut-3',7-di-O-glc: Luteolin-3',7-di-O-glucoside; Lut-7-O-glc: Luteolin-7-O-glucoside; Api-7-O-glc: Apigenin-7-O-glucoside; Chry-O-gly: Chrysoeriol-O-glycoside; Lut-4'-O-glc: Luteolin-4'-O-glucoside; Lut: Luteolin; Api: Apigenin.
